# Supplementary material for: A Holocene alpine seismic chronicle from Lake Aiguebelette (NW French Alps)
Source: Copernicus journal article supplement (doi:10.5194/nhess-2024-83), 2024-06-03
Supplement: Supplementary file 1 [file nhess-2024-83-supplement.pdf]

1 **Supplementary Materials**

2 **SM-1:** (A) Description of the AIG17III (Lake Aiguebelette deep basin) sequence and its 8 units (from Banjan et al. 2023);

3 (B) Detailed log of the AIG17III sequence (also available in Banjan et al. 2023, Supplementary Materials).

4

5 (A)

| Unit | Depth MCD (master core depth (cm)) | Description                                                                                   | Specific characteristics                                                                                                                                                                       |
|------|------------------------------------|-----------------------------------------------------------------------------------------------|------------------------------------------------------------------------------------------------------------------------------------------------------------------------------------------------|
| 1    | 0 - 21                             | Brown to greenish clays with alternations of type 1), 2) and 3) laminae                       | Topped by three silty layers (of 2 to 3 mm each); laminae are less diffuse from 104.5 to 165 cm MCD                                                                                            |
| 2    | 21.1 - 165.5                       | Gray to brownish clay with faint lamination                                                   |                                                                                                                                                                                                |
| 3    | 165.5 - 374.2                      | Gray to brownish sediments with alternation of type 1), 2) and 3) laminae                     | Topped by a 5 cm-thick visually homogeneous brown clayey to silty event layer (the thickest one observed in this unit)                                                                         |
| 4    | 374.2 - 513.9                      | Olive brown clays                                                                             | Alternating thin clayey to silty dark sections and clear gray to yellow laminae                                                                                                                |
| 5    | 513.9 - 728.7                      | Thin clayey to silty layers of brown to greenish-gray with submillimeter-scale darker laminae |                                                                                                                                                                                                |
| 6    | 728.7 - 1150.3                     | Brown to greenish-gray clayey-silty sediment with millimeter-scale laminae                    | Part of this unit is composed of an event layer. This event layer is constituted by a 31.4 cm thick sandy graded base topped by an 83.6 cm thick homogenous deposit (Fig. 6). These two facies |

|   |                 |                                                                                                                        |                                                                                 |
|---|-----------------|------------------------------------------------------------------------------------------------------------------------|---------------------------------------------------------------------------------|
|   |                 |                                                                                                                        | constitute the thickest (115 cm) event layer of the sediment sequence           |
| 7 | 1150.3 - 1410.7 | Gray—brownish clay and silt with fine millimeter-scale dark and clear gray laminae with no specific repetitive pattern | Millimetric- to centimetric-graded sandy event layers are observed in this unit |
| 8 | 1410.7 - 1597.6 | Clayey to silty gray and olive green sediments with thicker (several mm thick) laminae                                 | The lower 70 cm are characterized by faint lamination                           |

6

7 (B)

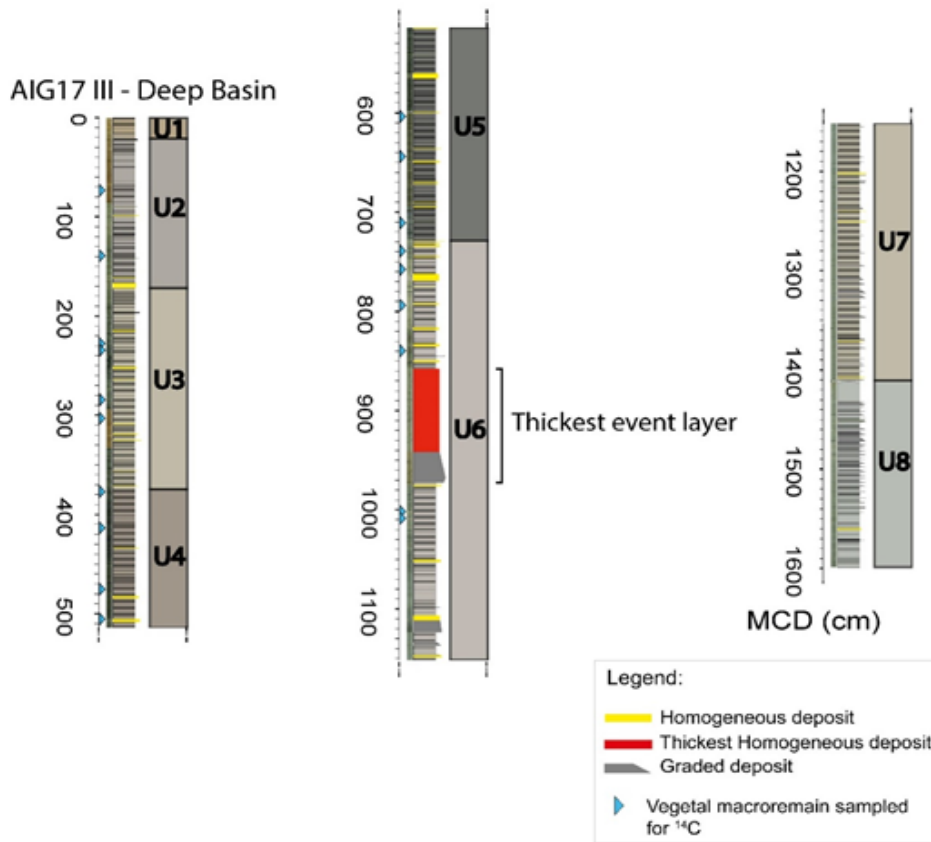

8

9 SM-2: Correlations between cores from Lake Aiguebelette deep basin.

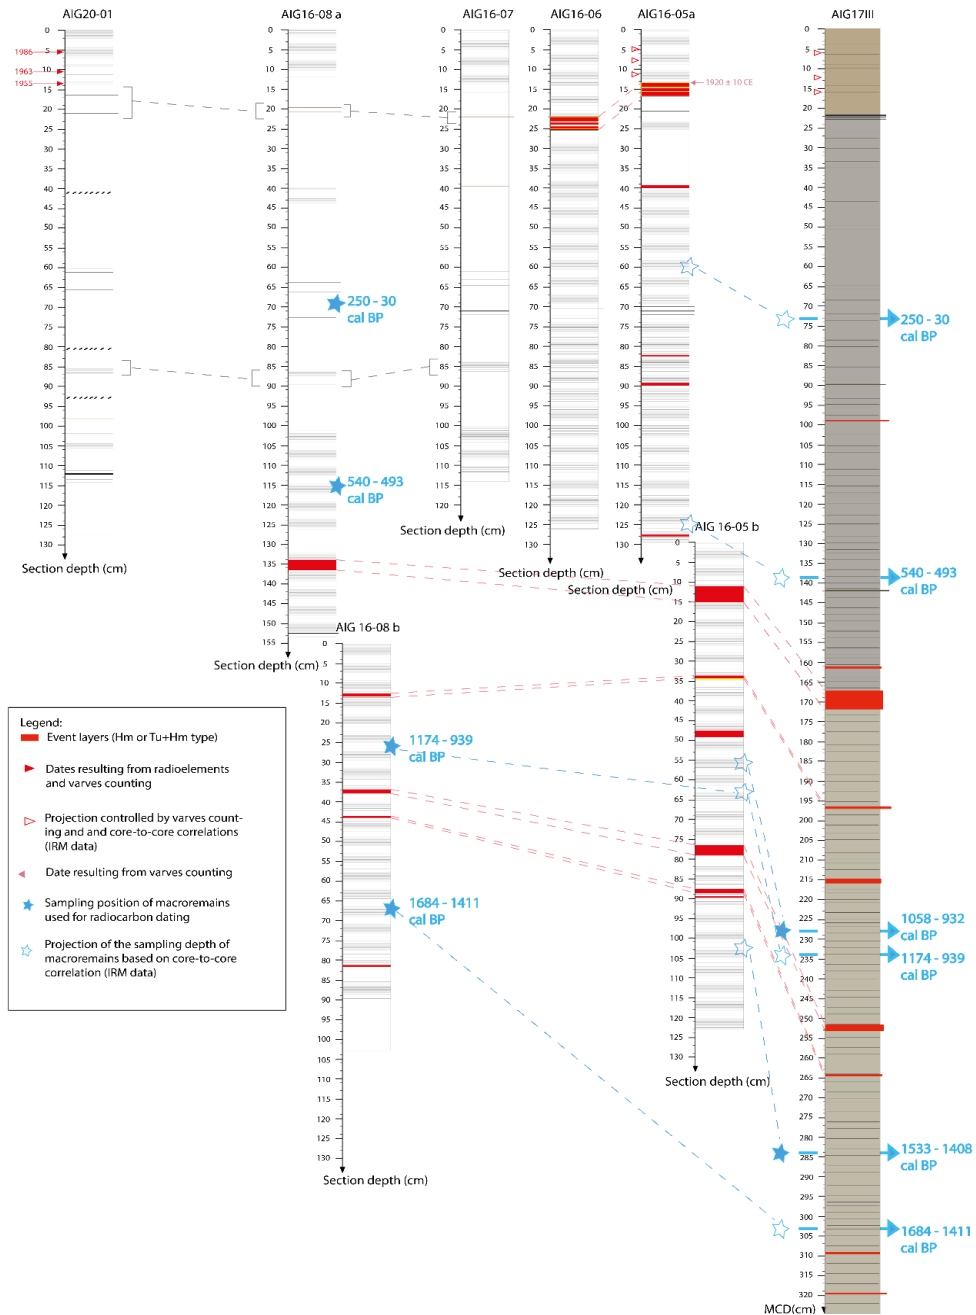

10

11

12 **SM-3:** Correlations of the ChRM data with the continuous global magnetic field model Cals10K from Korte et al. (2011).

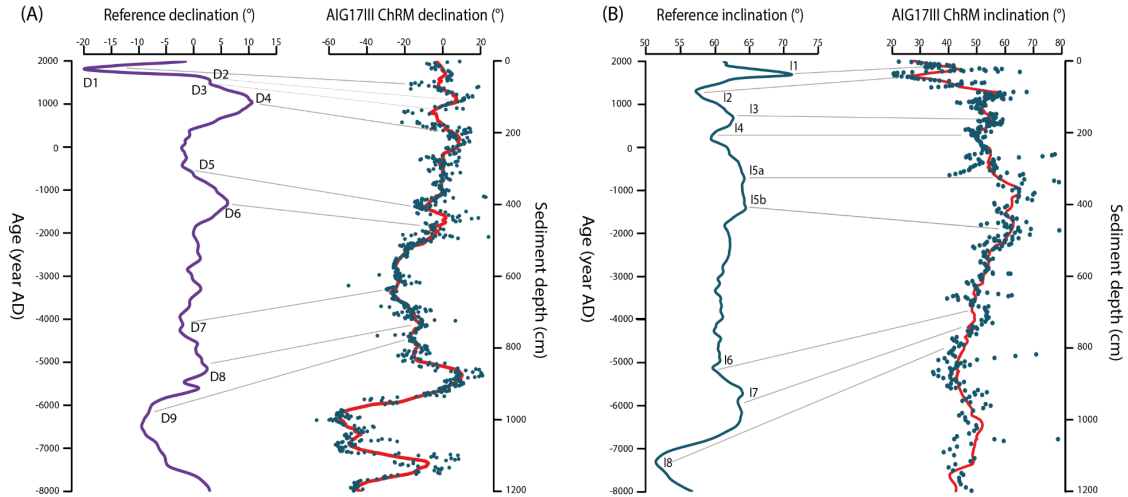

13  
 14  
 15 **SM-4:** Standard deviation (STD) and maximal angular variation (MAV) of the declination and inclination of the  
 16 Characteristic Remanent Magnetization for different studied lakes compared to the Arch 3k model. Lake Aiguebelette is  
 17 indicated in bold. The data from several lakes from Crouzet et al. (2019a) and Lund and Platzman (2016) are indicated  
 18 for comparison. The number (Nb) of values used for calculation is indicated.

|                    | Declination |       | Inclination |      |      | Nb  |
|--------------------|-------------|-------|-------------|------|------|-----|
|                    | STD         | MAV   | Average     | STD  | MAV  |     |
| THU                | 24.8        | 101.3 | 56.8        | 8.1  | 48.3 | 218 |
| ALO                | 5.2         | 21.8  | 49.6        | 7.1  | 34.8 | 64  |
| BLB                | 15.0        | 61.8  | 56.6        | 7.2  | 30.6 | 49  |
| EYC                | 19.6        | 76.5  | 62.5        | 9.8  | 37.4 | 46  |
| DOS                | 18.8        | 68.8  | 72.5        | 6.5  | 25.0 | 33  |
| ZACA               | -           | 65.0  | 50.0        | -    | 20   | -   |
| <b>AIG (0-300)</b> | 8.8         | 58.1  | 46.1        | 11.7 | 49.7 | 178 |
| Arch 3k            | 10.7        | 39.7  | 61.9        | 4.2  | 14.5 | 160 |

19 SM-5: Presentation of the event layers (Hm or Tu+Hm type) interpreted as seismically-induced and correlations between  
 20 cores at the scale of the deep basin (AIG16-05; AIG17III). Possible correlations to historical earthquakes identified in  
 21 other regional lakes are suggested in this table. The depositional date of the event layer is given based on (based on the  
 22 age-depth model (Fig. 8) and core-to-core correlations). The thickness of each event layer is indicated in red and the depth  
 23 in orange (cm MCD). Based on this study, a confidence index is provided: (+) indicates it is highly possible that the  
 24 historical earthquake triggered the archived event layer, whereas (-) indicates that a correlation is possible in terms of  
 25 occurrence but has been disregarded.

26

| AIG16-05           | AIG17III           | Depositional date of the event layer (y cal CE) | Possible triggering historical earthquake, confidence index | Earthquake archived in the sediments of Lake                                                                                      |
|--------------------|--------------------|-------------------------------------------------|-------------------------------------------------------------|-----------------------------------------------------------------------------------------------------------------------------------|
| 0.2<br>82.2-82.5   |                    | 1760-1824                                       | *1822 CE Bugey, (-)<br>**1784 CE Chartreuse, (+)            | *Bourget: Chapron et al. (1999)<br><br>**Paladru (?):<br>Chapron et al. (2016)                                                    |
| 0.7<br>89.3-90     |                    | 1528-1586                                       |                                                             |                                                                                                                                   |
| 0.5<br>127.5-128   |                    | 1581-1647                                       |                                                             |                                                                                                                                   |
| 4<br>140.5-144.5   | 4.8<br>166.6-171.4 | 1327-1372                                       | 1356 CE Basel, (-)                                          | Zurich: Strasser et al. (2013)<br><br>Baldegg See: Monecke et al. (2004)<br><br>Vierwaldstatter See:<br>Schnellmann et al. (2002) |
| 0.6<br>163.2-163.8 | 0.6<br>195.9-196.5 | 1186-1256                                       |                                                             |                                                                                                                                   |
| 0.6<br>205.8-208.6 |                    | 1039-1127                                       |                                                             |                                                                                                                                   |
| 2.8<br>205.8-208.6 | 1.7<br>250.9-252.6 | 712-801                                         |                                                             |                                                                                                                                   |
| 1<br>217.2-218.2   | 0.4<br>263.6-264   | 630 – 729                                       |                                                             |                                                                                                                                   |

27

28

29 SM-6: Records of historical earthquakes in lakes Aiguebelette (AIG), Le Bourget (LDB) and Paladru (LP). Data for LDB  
 30 and LP are from Chapron et al. (2016). The presence of event layers in the lake at a compatible date with the earthquake  
 31 occurrence is indicated by a cross. Lake Aiguebelette event layer has a depositional time window compatible with two  
 32 seismic events. The 1784 CE event is the favoured triggering seismic event (discussed in section 5.2.2).

| AIG | LDB | LP | Historical earthquake |
|-----|-----|----|-----------------------|
|     |     | x  | 1881 CE               |
|     |     | x  | 1869 CE               |
| x   | x   |    | 1822 CE               |
|     |     |    | 1784 CE               |
|     |     | x  | 1754 CE               |

33  
 34 Given the depositional time uncertainties, relative comparisons (see table above) of historical earthquakes archived in  
 35 regional lakes Aiguebelette, Le Bourget and Paladru suggest the possibility of synchronous to quasi-synchronous event  
 36 layers:

37 1754 CE: According to Chapron et al. (2016), the event layer labelled MWD3 in lake Paladru is described as possibly  
 38 contemporary to the 1754 CE Voreppe event. The age of this event layer is estimated at  $1660 \pm 100$  CE based on seismic  
 39 stratigraphy and the age-depth model available in Simonneau et al. (2013). Given the broad range of this estimate, the  
 40 possibility that both Lake Aiguebelette and Lake Paladru may have archived the 1784 CE Chartreuse earthquake is not  
 41 excluded. This indicates that the 1784 CE event, not discussed in other regional studies until now, may have had an  
 42 influence on event layer deposition at a regional scale.

43 1822 CE: In Chapron (1999), the depositional time of a homogenite identified in Lake Bourget was constrained by an  
 44 extrapolation of the sedimentation rate with a 10-yr resolution, based on the upper sediment  $^{210}\text{Pb}$  data. This gives an age  
 45 of 1831 CE at the top of this homogenite. This event layer was correlated to the seismic event of 1822 CE. Since then, no  
 46 new data constrained its depositional date. This “1822 CE” homogenite is considered as a chronological marker in Lake  
 47 Bourget.

48 In Lake Aiguebelette, the 1784 CE seismic event was favoured over the 1822 CE earthquake as the triggering mechanism  
 49 for the homogenite that deposited in the 1760-1824 CE range (see section 5.2.2.). Even if the depositional time window

50 of this event layer in Lake Aiguebelette is compatible with the 1822 CE seismic event and homogenite in Lake Bourget,  
51 it is unlikely that the two event layers in each lake deposited at the same time.

52 More recent historical earthquakes have not been archived at a regional scale (one or more lakes, including AIG, LDB or  
53 LP).

54  
55 SM-7: Age and thickness of the Hm and Tu+Hm event layers ( $\geq 0.5$  cm) archived in the studied cores of Lake Aiguebelette  
56 deep basin. The “best age” in CE is estimated based on the multi-proxy age-depth model (Fig. 8). This data table was  
57 used to generate the histograms (Fig. 12 and Fig. 13).

58

| Age (CE) | Thickness (cm) |
|----------|----------------|
| 1760     | 0.8            |
| 1581     | 0.7            |
| 1327     | 0.5            |
| 1288     | 4.8            |
| 1186     | 4              |
| 1143     | 0.6            |
| 1031     | 1.2            |
| 775      | 1.7            |
| 380      | 0.8            |
| 316      | 0.5            |
| 277      | 0.6            |
| -2164    | 2.5            |
| -2261    | 0.5            |
| -2936    | 4.3            |
| -3449    | 0.7            |
| -3469    | 0.5            |

| Age (CE) | Thickness (cm) |
|----------|----------------|
| -4221    | 1              |
| -4600    | 0.5            |
| -4982    | 0.6            |
| -5053    | 0.7            |
| -5914    | 0.8            |
| -5967    | 1.2            |
| -6242    | 0.5            |
| -6780    | 0.5            |
| -6783    | 6.3            |
| -7570    | 1.2            |
| -8427    | 2.2            |
| -9044    | 2.4            |
| -9340    | 1.8            |
| -9508    | 1.8            |
| -9785    | 83.6           |
| -9884    | 1.1            |

59

60

61 **References (Supplementary Materials):**

62 Chapron, E., Beck, C., Pourchet, M., and Deconinck, J. F.: 1822 earthquake-triggered homogenite in Lake Le Bourget  
63 (NW Alps), *Terra Nova*, 11, 86-92, 1999.

64  
65 Chapron, E., Simonneau, A., Ledoux, G., Arnaud, F., Lajeunesse, P., and Albéric, P.: French Alpine Foreland Holocene  
66 paleoseismicity revealed by coeval mass wasting deposits in glacial lakes, In *Submarine Mass Movements and their  
67 Consequences: 7th International Symposium*, Springer International Publishing, 341-349, 2016.

68  
69 Crouzet, C., Wilhelm, B., Sabatier, P., Demory, F., Thouveny, N., Pignol, C., Arnaud, F.: Palaeomagnetism for  
70 chronologies of recent Alpine lake sediments: successes and limits, *Journal of Paleolimnology*, 62, 259-278, 2019a.

71  
72 Lund, S. P., and Platzman, E.: Paleomagnetic chronostratigraphy of late Holocene Zaca Lake, California, *The Holocene*,  
73 26, 814-821, 2016.

74  
75 Monecke, K., Anselmetti, F. S., Becker, A., Sturm, M., and Giardini, D.: The record of historic earthquakes in lake  
76 sediments of Central Switzerland, *Tectonophysics*, 394, 21-40, 2004.

77  
78 Schnellmann, M., Anselmetti, F. S., Giardini, D., McKenzie, J. A., and Ward, S. N.: Prehistoric earthquake history  
79 revealed by lacustrine slump deposits, *Geology*, 30, 1131-1134, 2002.

80  
81 Simonneau, A., Doyen, E., Chapron, E., Millet, L., Vannière, B., Di Giovanni, C., Arnaud, F.: Holocene land-use  
82 evolution and associated soil erosion in the French Prealps inferred from Lake Paladru sediments and archaeological  
83 evidences, *Journal of Archaeological Science*, 40, 1636-1645, 2013.

84  
85 Strasser, M., Monecke, K., Schnellmann, M., Anselmetti, F. S.: Lake sediments as natural seismographs: A compiled  
86 record of Late Quaternary earthquakes in Central Switzerland and its implication for Alpine deformation, *Sedimentology*,  
87 60, 319-341, 2013.

88
